# Supplementary material for: Creation of an Implementation Blueprint for the National Emergency Airway Registry for Pediatric Emergency Medicine (NEAR4PEM) Pre-Intubation Checklist
Source: Research Square preprint supplement (doi:10.21203/rs.3.rs-8491286/v1), 2026-01-20
Supplement: Supplementary file 2 [file ed107744c718e28f4e19c306.docx]

**Principal Investigator:** Robyn Wing, MD, MPH, FAAP; rwing1@brownhealth.org

**Introduction and Consent:**

Thank you for participating in this survey! We are conducting research to understand the potential barriers and facilitators for implementing the new **National Emergency Airway Registry for Pediatric Emergency Medicine (NEAR4PEM) Pre-Intubation Checklist** in the Pediatric Emergency Department (PED). This checklist will be able to be customized with site-specific edits as needed. Your insights as a NEAR4PEM Principal Investigator (PI) and/or Airway Champion in your department are crucial for identifying key factors that can influence the successful adoption of this checklist.

There are no risks to completing this survey. You do not have to answer any question you do not want to answer. You may not benefit from completing this survey. However, by completing this survey you will help us to identify key factors that can influence the successful adoption of this checklist. Participation in this survey is voluntary. Participants from each site that obtain 3 survey completions will be entered into a raffle for a $50 gift card to be awarded to one participant at each site for survey participation.

Your responses will remain confidential and will contribute to improving the implementation process. By submitting this survey, you consent to the use of your responses for research purposes. Your individual responses will remain confidential, and only aggregated data will be used in the analysis and reporting of results. Responses are not anonymous to allow us to aid particular sites in the future with implementation tailored to their specific barrier concerns.

If you have any questions about your rights as a research participant, you may contact the Lifespan Research Protection Office Institutional Review Board (IRB) at 401-444-6246. An IRB is a group of people that reviews research studies to make sure that participant rights and safety are protected.

____________________________________________________________________________

**Section 1: Demographic Information:**

Name:

Email Address:

Affiliation/Institution (Drop down list of NEAR4PEM Sites):

What level of pediatric trauma center is your site?

[ ] 1 [ ] 2 [ ] 3 [ ] 4 [ ] 5 [ ] None [ ] Other (free text)

Airway Champion Team Role (Drop down):

[ ] NEAR4PEM Principal Investigator (PI)/ Co-PI [ ] Nurse Champion

[ ] RT Champion

[ ] Trauma Champion [ ] Pharmacist [ ] Other (text)

Discipline/Training Level (branch off if answer PI, co-PI, Trauma; drop down):

[ ] Attending PEM physician [ ] PEM Fellow [ ] Resident [ ] Registered nurse

[ ] Respiratory therapist [ ] Trauma surgeon [ ] Other (text)

Age:

Years of experience working in any PED (including fellowship for physicians):

Years of experience working at your current PED:

Does your site currently use a pre-intubation checklist in your PED? [ ] Yes [ ] No [ ] Not sure

Are any intubations in your PED supervised by non-PEM providers? [ ] Yes [ ] No [ ] Not sure

If yes, by whom:

[ ] ENT/ORL [ ] Anesthesia [ ] PICU [ ] Gen pediatrician [ ] Gen EM attending

[ ] Paramedic [ ]Critical Care RNs [ ] Respiratory therapy

[ ] Other (text______)

For each selection: How often are intubations performed by (add each non-PEM provider group) in your PED?

[ ] daily [ ] weekly [ ] monthly [ ] quarterly [ ] yearly [ ] less frequently than yearly [ ] Not sure

____________________________________________________________________________

**Section 2: NEAR4PEM Checklist:**

This is the NEAR4PEM Pre-Intubation Checklist, which has been rigorously developed over the last 2 years using extensive feedback and multimodal methods. It was designed to be concise, yet complete, and to be used for all intubations in the PED, except for patients in cardiac arrest. Please take a few minutes to review it. (Show photo of checklist, with next questions on the same page)

Prior to this survey, had you seen this new NEAR4PEM checklist proposed for the PED? [ ] Yes [ ] No

Were you involved in the development or design of this new NEAR4PEM Checklist? [ ] Yes [ ] No

How do you perceive the potential impact of this new NEAR4PEM Checklist on patient care and safety?

(1 = Strong negative impact; 2= Negative impact, 3 = No Impact, 4 = Positive impact, 5 = strong positive impact)

To what extent do you feel that this checklist could:

|  | Not at all | A little | Somewhat | Very much |
| --- | --- | --- | --- | --- |
| Decrease adverse airway outcomes (AAOs), such as desaturation, airway injury, esophageal intubations, mainstem intubations, etc? | □ | □ | □ | □ |
| Increase first attempt success (FAS)? | □ | □ | □ | □ |

____________________________________________________________________________

**Section 3: Hospital/Unit Culture:**

We are curious about your perceptions of your department’s quality improvement (QI) culture. In focus groups, we found that some institutions identified a pre-existing strong “QI culture” or a “checklist culture”, while others did not.

Please rate your level of agreement with the following statements:

|  | Strongly disagree | Disagree | Agree | Strongly  Agree |
| --- | --- | --- | --- | --- |
| Change is perceived as an opportunity for growth and improvement within our department. | □ | □ | □ | □ |
| New quality improvement/patient safety initiatives are well received in our department. | □ | □ | □ | □ |
| Our department is comfortable with using checklists in the clinical setting. (Our department has a “checklist culture”.) | □ | □ | □ | □ |
| Our staff will be happy to implement the new NEAR4PEM Checklist. | □ | □ | □ | □ |

**Section 4: Barriers to Implementation:**

Multidisciplinary focus groups of Airway Champions from NEAR4PEM sites revealed the following 7 themes of **barriers to implementation.** We would like you to consider the **impact** of each one, as well as the **feasibility to address** the barrier. There will be one page per barrier theme.

Keep in mind that we are looking for relative importance/impact in order to differentiate the barriers from one another; please use all the values in the rating scale to make distinctions.

**Theme 1**

**We will start by considering barriers related to introducing a new process into the clinical setting.**

**Barrier: Team members will not know who should lead the Checklist during a resuscitation**

| **Question** | **No Impact** | **Little Impact** | **Some Impact** | **Strong Impact** |
| --- | --- | --- | --- | --- |
| How much impact will this barrier have to successful implementation of the NEAR4PEM Checklist in your PED? | □ | □ | □ | □ |

| **Question** | **Not at all feasible** | **Somewhat feasible** | **Feasible** | **Very Feasible** |
| --- | --- | --- | --- | --- |
| How feasible is it to address this barrier to implementation of the NEAR4PEM Checklist in your PED? | □ | □ | □ | □ |

**Barrier: Team will have difficulty consistently accessing/locating the Checklist for use during resuscitations.**

| **Question** | **No Impact** | **Little Impact** | **Some Impact** | **Strong Impact** |
| --- | --- | --- | --- | --- |
| How much impact will this barrier have to successful implementation of the NEAR4PEM Checklist in your PED? | □ | □ | □ | □ |

___________________________

| **Question** | **Not at all feasible** | **Somewhat feasible** | **Feasible** | **Very Feasible** |
| --- | --- | --- | --- | --- |
| How feasible is it to address this barrier to implementation of the NEAR4PEM Checklist in your PED? | □ | □ | □ | □ |

___________________________________________________

**Theme 2**

**Now we are going to talk about barriers related to team acceptance.**

**Barrier: Team members will be unwilling to adapt to using the Checklist and will continue current intubation workflow (resistance to change).**

| **Question** | **No Impact** | **Little Impact** | **Some Impact** | **Strong Impact** |
| --- | --- | --- | --- | --- |
| How much impact will this barrier have to successful implementation of the NEAR4PEM Checklist in your PED? | □ | □ | □ | □ |

| **Question** | **Not at all feasible** | **Somewhat feasible** | **Feasible** | **Very Feasible** |
| --- | --- | --- | --- | --- |
| How feasible is it to address this barrier to implementation of the NEAR4PEM Checklist in your PED? | □ | □ | □ | □ |

**Barrier: Our team is just not familiar with utilizing checklists in the clinical setting (Lack of “checklist culture”).**

| **Question** | **No Impact** | **Little Impact** | **Some Impact** | **Strong Impact** |
| --- | --- | --- | --- | --- |
| How much impact will this barrier have to successful implementation of the NEAR4PEM Checklist in your PED? | □ | □ | □ | □ |

| **Question** | **Not at all feasible** | **Somewhat feasible** | **Feasible** | **Very Feasible** |
| --- | --- | --- | --- | --- |
| How feasible is it to address this barrier to implementation of the NEAR4PEM Checklist in your PED? | □ | □ | □ | □ |

______________________________________________________________________________**Theme 3**

**Now we are going to talk about barriers related to pre-implementation planning.**

**Barrier: Multidisciplinary and interdepartmental groups have not traditionally been involved in quality improvement initiatives.**

| **Question** | **No Impact** | **Little Impact** | **Some Impact** | **Strong Impact** |
| --- | --- | --- | --- | --- |
| How much impact will this barrier have to successful implementation of the NEAR4PEM Checklist in your PED? | □ | □ | □ | □ |

| **Question** | **Not at all feasible** | **Somewhat feasible** | **Feasible** | **Very Feasible** |
| --- | --- | --- | --- | --- |
| How feasible is it to address this barrier to implementation of the NEAR4PEM Checklist in your PED? | □ | □ | □ | □ |

**Barrier: Divisional/department leadership does not/will not support use of the Checklist.**

| **Question** | **No Impact** | **Little Impact** | **Some Impact** | **Strong Impact** |
| --- | --- | --- | --- | --- |
| How much impact will this barrier have to successful implementation of the NEAR4PEM Checklist in your PED? | □ | □ | □ | □ |

| **Question** | **Not at all feasible** | **Somewhat feasible** | **Feasible** | **Very Feasible** |
| --- | --- | --- | --- | --- |
| How feasible is it to address this barrier to implementation of the NEAR4PEM Checklist in your PED? | □ | □ | □ | □ |

______________________________________________________________________________**Theme 4**

**Now we are going to talk about barriers related to training/education challenges.**

**Barrier: We will have difficulty providing education/training about the Checklist (for an infrequent procedure) to a large number of staff due to high rate of staff attrition and onboarding (high staff turnover).**

| **Question** | **No Impact** | **Little Impact** | **Some Impact** | **Strong Impact** |
| --- | --- | --- | --- | --- |
| How much impact will this barrier have to successful implementation of the NEAR4PEM Checklist in your PED? | □ | □ | □ | □ |

| **Question** | **Not at all feasible** | **Somewhat feasible** | **Feasible** | **Very Feasible** |
| --- | --- | --- | --- | --- |
| How feasible is it to address this barrier to implementation of the NEAR4PEM Checklist in your PED? | □ | □ | □ | □ |

**Barrier: We will have difficulty providing training/education due to other competing job responsibilities**

| **Question** | **No Impact** | **Little Impact** | **Some Impact** | **Strong Impact** |
| --- | --- | --- | --- | --- |
| How much impact will this barrier have to successful implementation of the NEAR4PEM Checklist in your PED? | □ | □ | □ | □ |

| **Question** | **Not at all feasible** | **Somewhat feasible** | **Feasible** | **Very Feasible** |
| --- | --- | --- | --- | --- |
| How feasible is it to address this barrier to implementation of the NEAR4PEM Checklist in your PED? | □ | □ | □ | □ |

**Barrier: We will have difficulty providing education/training to staff in ancillary departments that are more rarely involved in pediatric intubation in the PED (e.g.. ENT, anesthesia, PICU, NICU)**

| **Question** | **No Impact** | **Little Impact** | **Some Impact** | **Strong Impact** |
| --- | --- | --- | --- | --- |
| How much impact will this barrier have to successful implementation of the NEAR4PEM Checklist in your PED? | □ | □ | □ | □ |

| **Question** | **Not at all feasible** | **Somewhat feasible** | **Feasible** | **Very Feasible** |
| --- | --- | --- | --- | --- |
| How feasible is it to address this barrier to implementation of the NEAR4PEM Checklist in your PED? | □ | □ | □ | □ |

______________________________________________________________________________

**Theme 5**

**Now we are going to talk about barriers related to sustainment planning.**

**Barrier: Team members will lose interest in Checklist utilization if they do not feel included in the implementation process and/or are not informed about outcomes. (Lack of feedback incorporation about checklist and checklist use).**

| **Question** | **No Impact** | **Little Impact** | **Some Impact** | **Strong Impact** |
| --- | --- | --- | --- | --- |
| How much impact will this barrier have to successful implementation of the NEAR4PEM Checklist in your PED? | □ | □ | □ | □ |

| **Question** | **Not at all feasible** | **Somewhat feasible** | **Feasible** | **Very Feasible** |
| --- | --- | --- | --- | --- |
| How feasible is it to address this barrier to implementation of the NEAR4PEM Checklist in your PED? | □ | □ | □ | □ |

**Barrier: We have difficulty continuing use of quality initiatives after their initial introduction due to a lack of process for sustainment.**

| **Question** | **No Impact** | **Little Impact** | **Some Impact** | **Strong Impact** |
| --- | --- | --- | --- | --- |
| How much impact will this barrier have to successful implementation of the NEAR4PEM Checklist in your PED? | □ | □ | □ | □ |

| **Question** | **Not at all feasible** | **Somewhat feasible** | **Feasible** | **Very Feasible** |
| --- | --- | --- | --- | --- |
| How feasible is it to address this barrier to implementation of the NEAR4PEM Checklist in your PED? | □ | □ | □ | □ |

______________________________________________________________________________

**Theme 6**

**Now we are going to talk about barriers related to risks of checklist use.**

**Barrier: Team members perceive that the Checklist may take too long to complete.**

| **Question** | **No Impact** | **Little Impact** | **Some Impact** | **Strong Impact** |
| --- | --- | --- | --- | --- |
| How much impact will this barrier have to successful implementation of the NEAR4PEM Checklist in your PED? | □ | □ | □ | □ |

| **Question** | **Not at all feasible** | **Somewhat feasible** | **Feasible** | **Very Feasible** |
| --- | --- | --- | --- | --- |
| How feasible is it to address this barrier to implementation of the NEAR4PEM Checklist in your PED? | □ | □ | □ | □ |

**Barrier: Team members may fear legal risks created by this quality improvement initiative (e.g. negative consequences if not followed precisely).**

| **Question** | **No Impact** | **Little Impact** | **Some Impact** | **Strong Impact** |
| --- | --- | --- | --- | --- |
| How much impact will this barrier have to successful implementation of the NEAR4PEM Checklist in your PED? | □ | □ | □ | □ |

| **Question** | **Not at all feasible** | **Somewhat feasible** | **Feasible** | **Very Feasible** |
| --- | --- | --- | --- | --- |
| How feasible is it to address this barrier to implementation of the NEAR4PEM Checklist in your PED? | □ | □ | □ | □ |

______________________________________________________________________________

**Theme 7**

**Now we are going to talk about barriers related to perceived lack of need.**

**Barrier: Team Members feel that they do not need a checklist because they already know the steps and equipment necessary for intubation.**

| **Question** | **No Impact** | **Little Impact** | **Some Impact** | **Strong Impact** |
| --- | --- | --- | --- | --- |
| How much impact will this barrier have to successful implementation of the NEAR4PEM Checklist in your PED? | □ | □ | □ | □ |

| **Question** | **Not at all feasible** | **Somewhat feasible** | **Feasible** | **Very Feasible** |
| --- | --- | --- | --- | --- |
| How feasible is it to address this barrier to implementation of the NEAR4PEM Checklist in your PED? | □ | □ | □ | □ |

**Barrier: Team members are unaware, or fail to acknowledge, that emergent pediatric intubation is a procedure with many risks.**

| **Question** | **No Impact** | **Little Impact** | **Some Impact** | **Strong Impact** |
| --- | --- | --- | --- | --- |
| How much impact will this barrier have to successful implementation of the NEAR4PEM Checklist in your PED? | □ | □ | □ | □ |

| **Question** | **Not at all feasible** | **Somewhat feasible** | **Feasible** | **Very Feasible** |
| --- | --- | --- | --- | --- |
| How feasible is it to address this barrier to implementation of the NEAR4PEM Checklist in your PED? | □ | □ | □ | □ |

**Barrier: Team members are unaware, or fail to acknowledge, that checklist use has improved outcomes for pediatric intubation in the PICU and NICU settings.**

| **Question** | **No Impact** | **Little Impact** | **Some Impact** | **Strong Impact** |
| --- | --- | --- | --- | --- |
| How much impact will this barrier have to successful implementation of the NEAR4PEM Checklist in your PED? | □ | □ | □ | □ |

| **Question** | **Not at all feasible** | **Somewhat feasible** | **Feasible** | **Very Feasible** |
| --- | --- | --- | --- | --- |
| How feasible is it to address this barrier to implementation of the NEAR4PEM Checklist in your PED? | □ | □ | □ | □ |

Are there any other barriers to implementation that you foresee? (text) _______________

____________________________________________________________________________

For this free text barrier, please rate that factor based on the extent to which the following barriers will impact the ability to successfully implement the NEAR4PEM Checklist in your PED:

For this free text barrier, please rate that factor based on the extent to which that barrier could be easily or conveniently addressed to attain NEAR4PEM Checklist use in your PED.

**Section 5: Implementation Blueprint Components:**

We want to learn more about how to best distribute information about new QI initiatives, such as the checklist, at your site.

Please consider the following methods’ effectiveness at distributing QI initiatives to your team.

Which of these channels gets information to you best (1 = worst; 4 = best)?

|  | 1 (Worst) | 2 | 3 | 4 (Best) |
| --- | --- | --- | --- | --- |
| Division Email | □ | □ | □ | □ |
| Division Meeting | □ | □ | □ | □ |
| Weekly huddle | □ | □ | □ | □ |
| Bulletin board | □ | □ | □ | □ |

Aside from the methods listed above, are there other ways in which you would suggest that new QI initiatives get distributed to your team? (free text)

____________________________________________________________________________

We are investigating ideal components for the multidisciplinary educational roll out of the NEAR4PEM Checklist. How effective would these potential implementation materials be in educating you and your team around checklist initiation and use?

|  | Not effective | Slightly  effective | Moderately effective | Very Effective |
| --- | --- | --- | --- | --- |
| Instructional Packet | □ | □ | □ | □ |
| Simulations | □ | □ | □ | □ |
| Informational Email(s) | □ | □ | □ | □ |
| Educational Video(s) | □ | □ | □ | □ |

Aside from the list above, what other materials would you need to help you implement this checklist in your PED? (text)_____________________

Would you prefer that educational materials be specifically crafted for your discipline (e.g. RN, RT, physician-specific training) OR generalized to the PED as a whole with sections dedicated to each discipline?

[ ] Discipline-specific [ ] Generalized

**Section 7: Additional Comments:**

Please provide any additional comments or insights you have regarding the implementation of the NEAR4PEM Pre-Intubation Checklist in the PED. (Free text)

**Section 8: Site Interest:**

Is your site interested in adopting the NEAR4PEM Pre-Intubation Checklist for use in your PED once it is finalized and rolled out with implementation supports?

[ ] Yes [ ] No [ ] Unsure
